# Supplementary material
Source: Royal Society of Chemistry journal article supplement (https://www.rsc.org/suppdata/cc/1999/2095/906260b.doc)
Supplement: Supplementary file 1 [file 906260b.doc]

**Supplementary data**

**Novel concise synthesis of 3,4-dihydro-2*H*-1,4-benzoxazines by ring opening of epoxides under solid-liquid phase transfer catalysis conditions**

**Domenico Albanese,* Dario Landini, and Michele Penso**

*Dipartimento di Chimica Organica e Industriale dell'Università e Centro CNR, via Golgi 19, I-20133 Milano, Italia. E-mail: domenico@iumchz.chimorg.unimi.it*

**General**

Epoxides **2** are commercially available. K2CO3 was dried by heating at 140 °C in vacuum (0.05 mmHg) for 6 h. 1H, 19F and 13C NMR spectra were recorded in CDCl3 at 300.1, 282.4 and 75.5 MHz using TMS (1H), CFCl3 (19F) as external standards and CHCl3 (13C) as internal standard. The coupling constants are in Hz. IR spectra were recorded on a FT-IR 1725 Perkin Elmer spectrometer and frequency values are in cm-1. Optical rotations were measured with a Perkin Elmer 241 instrument. Melting points are corrected.

**3a**: A screw cap vial was charged with *N*-(2-fluorophenyl)toluene-*p*-sulfonamide (**1**) (1.1 mmol), 1,2-epoxy-3-phenoxypropane (**2a**) (150 mg, 1 mmol), K2CO3 (14 mg, 0.1 mmol), TEBA (23 mg, 0.1 mmol) and stirred at 90 °C for 1 h. Addition of water, extraction with diethyl ether, drying with Na2SO4, filtration and solvent removal *in vacuo* gave a residue which was purified by column chromatography [SiO2:Et2O-light petroleum (PE, bp 40-60 °C) 1-1] to give **3a** (380 mg, 94%), mp 91-92 °C. 1H NMR (CDCl3): δ 2.40 (s, 3H), 2.80 (d, 1H, *J* = 4.1), 3.70-3.80 (m, 2H), 4.00-4.10 (m, 3H), 6.80-7.60 (m, 13H). 13C NMR (CDCl3, selected data): δ 21.6, 53.7, 68.6, 69.2. 19F NMR (CDCl3): δ -118.72. νmax (Nujol) 3564 (OH), 1345 (SO2N), 1162 (SO2N). Anal. Calc. for C22H22FNO4S: C, 63.60; H, 5.34; N, 3.37; S, 7.72. Found: C, 63.85; H, 5.30; N, 3.08; S, 7.51%.

(*S*)-**3b**: This was prepared from (2*S*)-[(benzyloxy)methyl]oxirane (*S*)-(**2b**) (164 mg, 1 mmol), K2CO3 (14 mg, 0.1 mmol), TEBA (23 mg, 0.1 mmol) by the same method as **3a** (386 mg, 90%), oil, [α]D20 = -4.1 (c 1, CH2Cl2). 1H NMR (CDCl3): δ 2.42 (s, 3H), 2.64 (d, 1H, *J* = 4.7), 3.53 (dd, 1H, *J* = 5.4 and 9.8), 3.59 (dd, 1H, *J* = 4.3 and 9.8), 3.65 (d, 2H, *J* = 6.1), 3.85 (m, 1H), 4.46 (m, 2H), 6.95-7.56 (m, 13H). 13C NMR (CDCl3, selected data): δ 21.5, 53.6, 68.9, 71.4, 73.4. 19F NMR (CDCl3): δ -118.57. νmax (Nujol) 3564 (OH), 1345 (SO2N), 1162 (SO2N). Anal. Calc. for C23H24FNO4S: C, 64.32; H, 5.63; N, 3.26; S, 7.47. Found: C, 64.58; H, 5.89; N, 3.02; S, 7.59%.

**4a**: A mixture of **3a** (100 mg, 0.24 mmol), ButOK (27 mg, 0.24 mmol) in THF (0.3 ml) was stirred at reflux for 0.5 h. ButOK (27 mg, 0.24 mmol) was added and stirring continued for 0.5 h. The crude product was purified by column chromatography [SiO2:Et2O-PE 1-6] to give **4a** (87 mg, 92%), mp 113-114 °C. 1H NMR (CDCl3): δ 2.38 (s, 3H), 3.38 (dd, 1H, *J* = 9.9 and 14.5), 3.67 (m, 1H), 3.92 (dd, 1H, *J* = 6.3 and 10.2), 4.10 (dd, 1H, *J* = 4.3 and 10.2), 4.48 (dd, 1H, *J* = 2.5 and 14.5) 6.80-7.90 (m, 13H). 13C NMR (CDCl3, selected data): δ 21.5, 46.2, 67.2, 69.6. νmax (Nujol) 1342 (SO2N), 1161 (SO2N). Anal. Calc. for C22H21NO4S: C, 66.82; H, 5.35; N, 3.54; S, 8.11. Found: C, 67.05; H, 5.25; N, 3.65, S, 8.30%.

(*S*)-**4b**: This was prepared from(*S*)-**3b** (100 mg, 0.23 mmol) and ButOK (52 mg, 0.46 mmol) by the same method as **3a** [SiO2:Et2O-PE 1-1] (85 mg, 90%), mp 108-110 °C, [α]D20 = -43.3 (c 1, CH2Cl2). 1H NMR (CDCl3): δ 2.37 (s, 3H), 3.28 (m, 1H), 3.51 (m, 3H), 4.34 (dd, 1H, *J* = 2.0 and 14.2), 4.52 (dd, 2H, *J* = 12.4 and 14.6), 6.80-7.85 (m, 13H). 13C NMR (CDCl3, selected data): δ 21.5, 46.3, 69.6, 70.7, 73.5. νmax (Nujol) 1350 (SO2N), 1164 (SO2N). Anal. Calc. for C23H23NO4S: C, 67.46; H, 5.66; N, 3.42; S, 7.83. Found: C, 67.28; H, 5.70; N, 3.48; S, 7.71%.

**5a**: This was prepared from **4a** (100 mg, 0.25 mmol) and sodium naphthalenide (0.75 mmol) solution in DME at -78 °C as described elsewhere8 (46 mg, 77%). 1H NMR (CDCl3): δ 3.39 (dd, 1H, *J* = 6.8 and 11.6), 3.56 (dd, 1H, *J* = 2.6 and 11.6), 3.76 (bs, 1H), 4.11 (dd, 1H, *J* = 6.7 and 9.7), 4.24 (dd, 1H, *J* = 4.9 and 9.7), 4.55 (m, 1H), 6.61-6.99 (m, 7H), 7.02-7.32 (m, 2H). 13C NMR (CDCl3, selected data): δ 42.5, 67.7, 72.2. νmax (Nujol) 3398 (NH). Anal. Calc. for C15H15NO2: C, 74.67; H, 6.27; N, 5.81. Found: C, 74.89; H, 6.41; N, 5.74%.

(*S*)-**5b**: This was prepared from (*S*)-**4b** (100 mg, 0.24 mmol) by the same method as **3a** (51 mg, 84%), [α]D20 = 21.7 (c 0.78, CH2Cl2). 1H NMR (CDCl3): δ 3.30 (dd, 1H, *J* = 7.3 and 11.6), 3.47 (dd, 1H, *J* = 2.6 and 11.6), 3.66 (dd, 1H, *J* = 6.0 and 10.1), 3.70 (bs, 1H), 3.77 (dd, 1H, *J* = 5.2 and 10.1), 4.38 (m, 1H), 4.63 (s, 2H), 6.58-6.83 (m, 4H), 7.30-7.40 (m, 5H). 13C NMR (CDCl3, selected data): δ 42.8, 70.2, 73.0, 73.6. νmax (Nujol) 3391 (NH). Anal. Calc. for C16H17NO2: C, 75.27; H, 6.71; N, 5.49. Found: C, 75.32; H, 6.79; N, 5.60%.
